# Supplementary material for: Suppressor of cytokine signaling 2 (SOCS2) deletion protects against multiple low dose streptozotocin-induced type 1 diabetes in adult male mice
Source: publisher site journal article supplement (doi:10.1515/hmbci-2015-0036), 2015-11-12
Supplement: Supplementary file 1 [file Supplementary Figures_HMBCI20150036.doc]

**Supplementary files**

**Supplementary Figure 1. Experimental scheme**

**Supplementary Figure 2. MLDSTZ induces diabetes in 2-months old male SOCS2+/+ and SOCS2−/−** **mice.** (A) Blood glucose was recorded every 3-4 days, starting on day 9 after first injection. (B) Body Weight; (C) Food Intake and (D) Water intake were recorded once a week. Student t-test analysis between treatment within genotype: *P<0.05, **P<0.001, ***P<0.0001. Student t-test analysis between genotype within treatment: +P<0.05, ++P<0.001, +++P<0.0001.

**Supplementary Figure 3. Glucose metabolism and homeostasis in 2-months old SOCS2+/+****and SOCS2−/− male mice**. (A) ipGTT. Blood glucose levels were followed during 120 min after overnight food withdrawal and after an i.p injection of D-glucose (2 g/kg body weigh). (B) Area under curve (AUC) analysis from ipGTT. (C) ipITT Blood glucose levels were followed during 60min after food withdrawal and after an i.p injection of insulin (0.75U/kg bw). (D) Area under curve (AUC) analysis from ipITT. IpITT Curve was normalized to the initial glucose of each group as 100%. *P<0.05, between treatment within genotype group, +P<0.05, between genotypes within treatment group; 2-way ANOVA. AUC for ipITT was generated from percentage reduction of plasma glucose after insulin administration. Data are shown as means ± SE. Student's t test analysis between treatment within genotype: *P<0.05, **P<0.001, ***P<0.0001. Student's t test analysis between genotype within treatment: +P<0.05, ++P<0.001, +++P<0.0001.
